# Supplementary material
Source: publisher site journal article supplement (https://www.dovepress.com/article/245514)
Supplement: Supplementary file 1 [file get_supplementary_file.php]

**Supplemental Table 1. Questionnaire**

| Patient’s No. | Sex：Female Male | Age: |
| --- | --- | --- |
| Diagnosis of Skin Disease: | | |
| Skin types：Dry, Oily, Normal | | |
| Do you have sensory symptoms of cutaneous pain：Yes, No  If yes, indicate the severity: below | | |
| Do you have a family history of cutaneous sensory symptoms：Yes, No | | |
| Severity of skin pain | | |
| Scored by participants：Scale 0—10;  0: no; 10: very severe. | | |
|  | | |
